# Supplementary material for: Gas Chromatography-Mass Spectrometry Coupled with Multivariate Statistical Analysis to Identify the Alpha Glucosidase Inhibitors from Flesh of Salacca zalacca Fruits and Their Molecular Docking Studies
Source: Hindawi journal article supplement (doi:10.1155/2021/8867773), 2021-01-25
Supplement: f1 [file 8867773.f1.docx]

**Supplementary Materials**

**
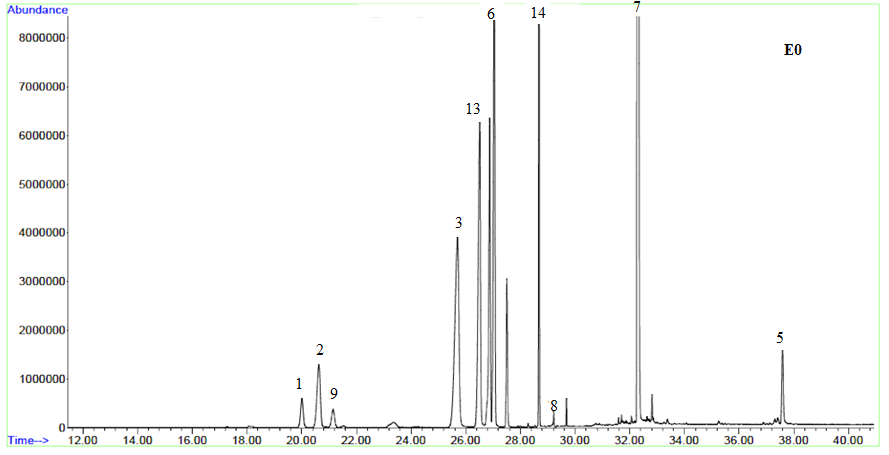
**

**
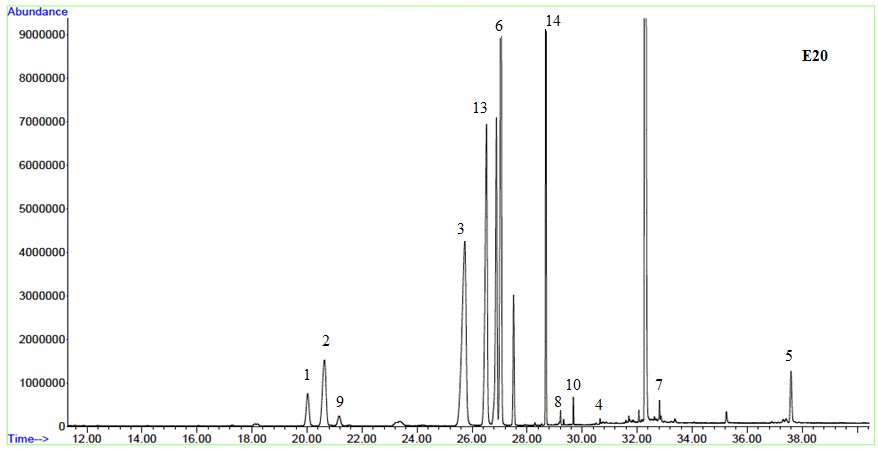
**

**
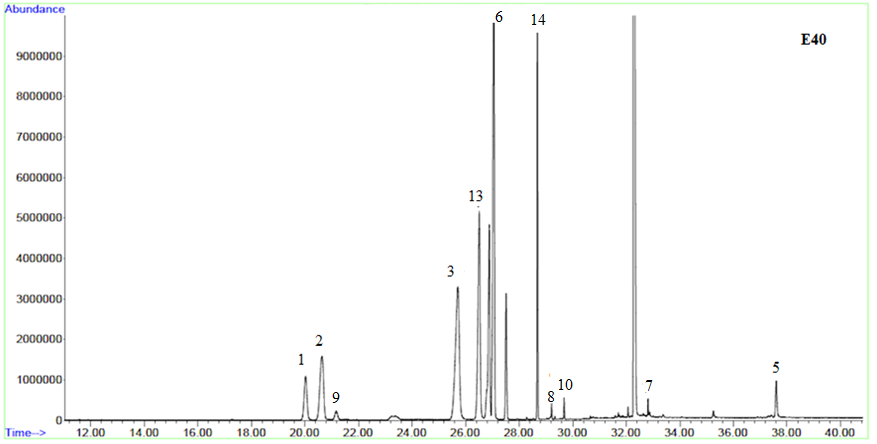
**

**
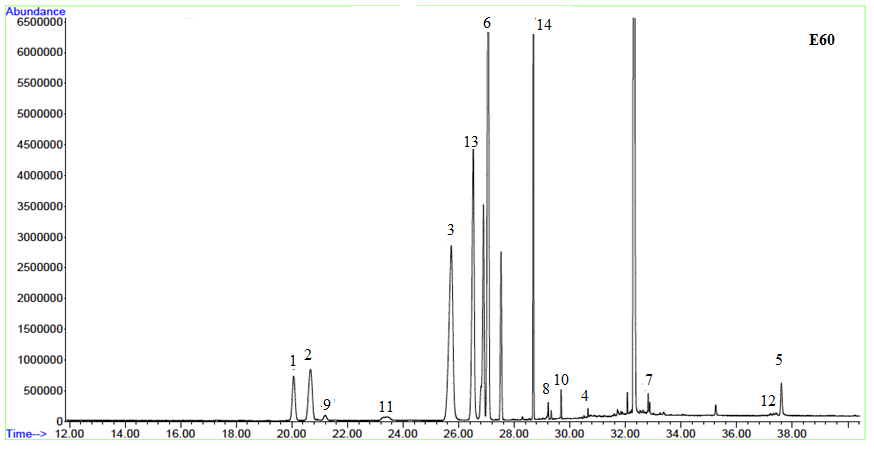
**

**
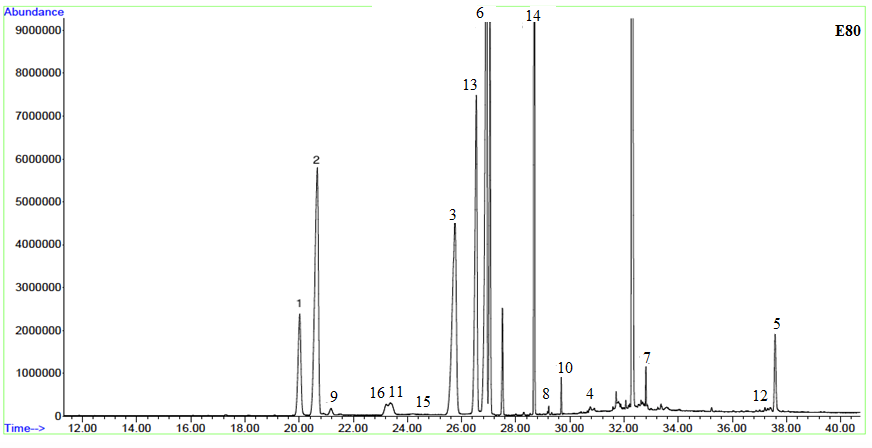
**


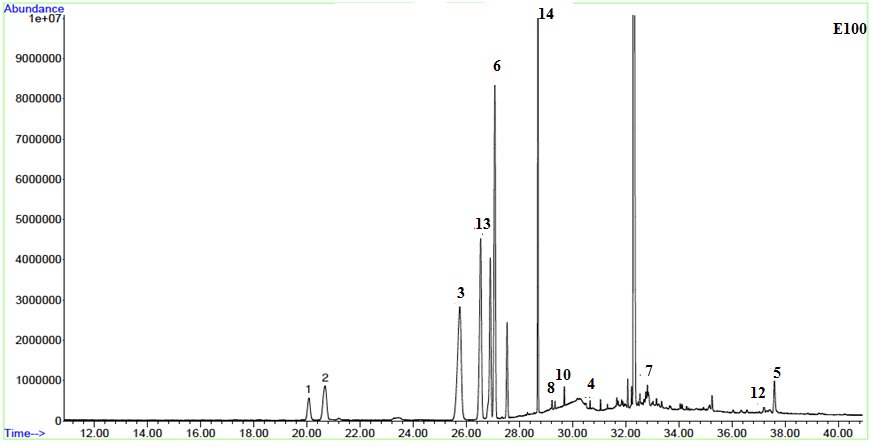


Figure S1. TIC chromatograms of *S. zalacca* extracts

Tentative compounds: 1; D-psicofuranose, 2; D-(-)-fructofuranose, 3; D-(-)-fructose, 4; Stearic acid, 5; Sucrose, 6; D-glucose, 7; D-(+)-trehalose, 8; Myo-Inositol, 9; Citric acid, 10; Palmitic acid, 11; D-(+)-talofuranose, 12; β-sitosterol, 13; α-D-glucopyranose, 14; β-D-glucopyranose, 15; D-(+)-xylose, and 16; D-psicopyranose.
